# Supplementary material for: Identification of Gene Modules and Hub Genes Associated with Sporisorium scitamineum Infection Using Weighted Gene Co-Expression Network Analysis
Source: MDPI journal article supplement (doi:10.3390/jof8080852), 2022-08-15
Supplement: s1 [file s1]

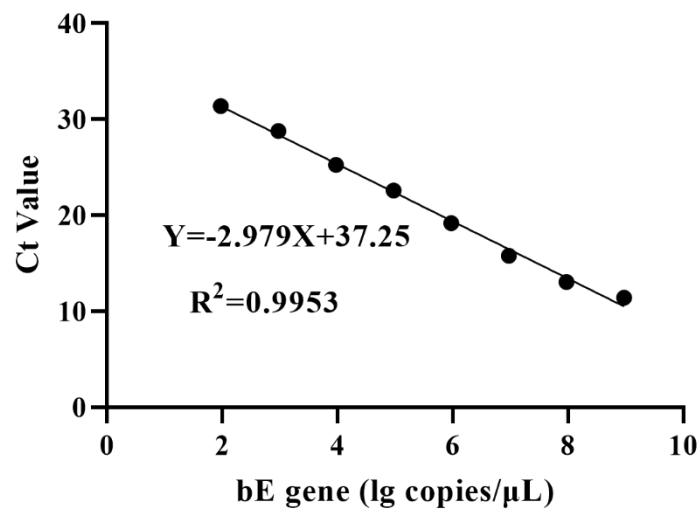

**Figure S1. Standard curve of TaqMan RT-qPCR.** The Ct values ranged from 11.41 to 31.39. The lowest concentration of the bE gene standard was 94.65 copies/μL. The amplification efficiency was 1.16 according to the equation:  $E = 10(-1/\text{Slope}) - 1$ , and  $R^2 = 0.9953$ . The standard curve was reliable and was used for further analysis.
