# Supplementary material for: Identification of Gene Modules and Hub Genes Associated with Sporisorium scitamineum Infection Using Weighted Gene Co-Expression Network Analysis
Source: J Fungi (Basel). 2022 Aug 15;8(8):852. doi: 10.3390/jof8080852 (PMC9409688; doi:10.3390/jof8080852)
Supplement: Supplementary file 1 [file jof-08-00852-s001.zip › Supplementary File 2.xlsx]

## Sheet: Table S1
Table S1 RT-qPCR primers used in the study
Primer	Sequence (5’-3’)
qPCR-SPSC_04669-F	ACCTCTCTGCAAACAACCCT
qPCR-SPSC_04669-R	TGTAATCGATGCAACCCTCCT
qPCR-SPSC_00877-F	AAATGGCAAAGTGGTGCGAC
qPCR-SPSC_00877-R	ATACGTTGGACGACTGGCTG
qPCR-SPSC_00958-F	CCTCTGCTCTTTGATGCCCA
qPCR-SPSC_00958-R	GAACCAGACTTGGGCGACTT
qPCR-SPSC_01092-F	GTTCGCACGACCGATTCAAC
qPCR-SPSC_01092-R	TCCAACCGCCATCTTCACTC
qPCR-SPSC_01798-F	CAGAAACGCGCAACGATCAA
qPCR-SPSC_01798-R	CAACAGGATCGACAGCGAGT
S10-F	CGTTGCAGGACATGGGTGTG
S10-R	TTCTCGTAGCTGTGCAGACCA
S11-F	GAATGCTTGGAGGCATGGGG
S11-R	GCGGGTTCATAGGGTCCTTC

## Sheet: Table S2
Table S2 Statistics of RNA sequencing data
Sample	Raw_bases(G)	Raw_reads	Clean_reads	Q30 (%)	GC content (%)	S. scitamineum mapped (%)
0h_1	6.46	43098844	40601560	98.55	56.4	31223837(97.57)
0h_2	6.54	43568782	40851944	98.4	56.34	30992753(97.40)
0h_3	6.84	45599222	42924682	98.5	56.43	32459586(97.24)
TROC22_24h1	11.14	74252532	71211976	98.85	52.73	34823(0.0625)
TROC22_24h2	12.11	80754574	77768942	98.9	53	51400(0.071)
TROC22_24h3	12.94	86297646	83021064	98.8	53.13	29121(0.0516)
TROC22_72h1	11.63	77503312	74513684	98.85	52.38	67520(0.1265)
TROC22_72h2	14.46	96367456	92440476	98.8	54.03	104853(0.1747)
TROC22_72h3	11.37	75832938	73054148	98.9	52.47	77500(0.1335)
TROC22_168h1	11.15	74305698	71663442	98.9	51.95	308800(0.5738)
TROC22_168h2	12.8	85327884	82265512	98.9	52.43	196146(0.3209)
TROC22_168h3	11.85	79028492	75848016	98.75	52.23	211244(0.3784)
TZZ1_24h1	10.93	72895236	69977324	98.85	54.24	25495(0. 0467)
TZZ1_24h2	11.41	76057182	72707884	98.7	53.9	21523(0.0374)
TZZ1_24h3	11.19	74578424	71233402	98.75	54.58	18433(0.0333)
TZZ1_72h1	10.89	72602852	69485926	98.8	54.41	79490(0. 1442)
TZZ1_72h2	11.39	75914556	72569914	98.75	54.01	27653(0.0482)
TZZ1_72h3	11.27	75149746	71875782	98.75	54.3	78940(0. 1401)
TZZ1_168h1	11.3	75322260	72108406	98.75	53.48	106634(0.1883)
TZZ1_168h2	11.02	73460550	70518944	98.85	53.9	80500(0.1424)
TZZ1_168h3	11.55	76968466	73693174	98.8	53.26	85940(0.1492)

## Sheet: Table S3
Table S3 GO enrichment analysis in MEpurple module
GO ID	GO Name	Class	Enrichment Score	p value	Hits Genes Counts	corrected p value (BH method)	Genes in GO term
GO:0005788	endoplasmic reticulum lumen	Cellular component	29.4643	3.26e-07	5	6.17e-05	SPSC_05439,SPSC_04115,SPSC_05619,SPSC_00297,SPSC_04071
GO:0044432	obsolete endoplasmic reticulum part	Cellular component	4.28571	1.48e-06	14	0.00014	SPSC_01093,SPSC_05439,SPSC_04115,SPSC_06411,SPSC_04473,SPSC_05906,SPSC_05619,SPSC_00297,SPSC_04995,SPSC_01486,SPSC_05288,SPSC_04071,SPSC_01291,SPSC_02117
GO:0005783	endoplasmic reticulum	Cellular component	3.18712	1.1e-05	16	0.000693	SPSC_01093,SPSC_05439,SPSC_04115,SPSC_06411,SPSC_04473,SPSC_05906,SPSC_05619,SPSC_00297,SPSC_02566,SPSC_04995,SPSC_01486,SPSC_05288,SPSC_04071,SPSC_01291,SPSC_01618,SPSC_02117
GO:0036503	endoplasmic reticulum membrane	Biological process	3.18214	5.73e-05	9	0.0355966	SPSC_01093,SPSC_06411,SPSC_04473,SPSC_05906,SPSC_04995,SPSC_01486,SPSC_05288,SPSC_01291,SPSC_02117
GO:0009100	extracellular region	Biological process	5.79625	0.000134	5	0.0396651	SPSC_01537,SPSC_05439,SPSC_03088,SPSC_06022,SPSC_03216
GO:0010243	endoplasmic reticulum protein-containing complex	Biological process	5.99274	0.000233	5	0.0397637	SPSC_05439,SPSC_04473,SPSC_05619,SPSC_01486,SPSC_02117
GO:0030433	endomembrane system	Biological process	1.97073	0.000407	17	0.040821	SPSC_01093,SPSC_05439,SPSC_04115,SPSC_06411,SPSC_04473,SPSC_05906,SPSC_05619,SPSC_00297,SPSC_02566,SPSC_04995,SPSC_01486,SPSC_05288,SPSC_04071,SPSC_02261,SPSC_01291,SPSC_01618,SPSC_02117
GO:0009056	endoplasmic reticulum subcompartment	Biological process	2.98793	0.00044	9	0.0443158	SPSC_01093,SPSC_06411,SPSC_04473,SPSC_05906,SPSC_04995,SPSC_01486,SPSC_05288,SPSC_01291,SPSC_02117
GO:1901698	nuclear outer membrane-endoplasmic reticulum membrane network	Biological process	3.01625	0.000447	9	0.0461116	SPSC_01093,SPSC_06411,SPSC_04473,SPSC_05906,SPSC_04995,SPSC_01486,SPSC_05288,SPSC_01291,SPSC_02117
GO:1901575	ERAD pathway	Biological process	8.44465	0.000476	6	0.0567724	SPSC_05439,SPSC_04115,SPSC_05619,SPSC_00297,SPSC_05288,SPSC_01291
GO:0034976	response to endoplasmic reticulum stress	Biological process	5.70585	0.000519	6	0.0570386	SPSC_05439,SPSC_04115,SPSC_05619,SPSC_00297,SPSC_05288,SPSC_01291
GO:0140534	organic substance catabolic process	Cellular component	2.36049	0.00126234	16	0.0588434	SPSC_04367,SPSC_03368,SPSC_05439,SPSC_04115,SPSC_05145,SPSC_03088,SPSC_04398,SPSC_00283,SPSC_05619,SPSC_00297,SPSC_05288,SPSC_01053,SPSC_01291,SPSC_01618,SPSC_00734,SPSC_03216
GO:0005576	response to nitrogen compound	Cellular component	5.86434	0.00146908	6	0.0631743	SPSC_05439,SPSC_04115,SPSC_05619,SPSC_00297,SPSC_05288,SPSC_01291
GO:0005789	glycoprotein metabolic process	Cellular component	7.27987	0.00150673	6	0.0664329	SPSC_01093,SPSC_05439,SPSC_05906,SPSC_05619,SPSC_00297,SPSC_02117
GO:0016757	catabolic process	Molecular function	2.19532	0.00177992	18	0.0726343	SPSC_02859,SPSC_04367,SPSC_03368,SPSC_05439,SPSC_04115,SPSC_05145,SPSC_03088,SPSC_04398,SPSC_00283,SPSC_05619,SPSC_03434,SPSC_00297,SPSC_05288,SPSC_01053,SPSC_01291,SPSC_01618,SPSC_00734,SPSC_03216
GO:0044248	response to organonitrogen compound	Biological process	6.59738	0.00208709	6	0.076989	SPSC_05439,SPSC_04115,SPSC_05619,SPSC_00297,SPSC_05288,SPSC_01291
GO:0042175	ubiquitin-dependent ERAD pathway	Cellular component	7.64914	0.00219579	5	0.0805065	SPSC_05439,SPSC_04115,SPSC_05619,SPSC_05288,SPSC_01291
GO:0098827	catalytic activity	Cellular component	1.2846	0.00234475	28	0.136957	SPSC_01526,SPSC_04367,SPSC_04003,SPSC_01093,SPSC_05439,SPSC_06411,SPSC_04954,SPSC_02540,SPSC_05931,SPSC_03088,SPSC_05906,SPSC_02767,SPSC_03976,SPSC_03548,SPSC_03303,SPSC_00283,SPSC_03434,SPSC_00297,SPSC_05063,SPSC_05288,SPSC_04071,SPSC_04191,SPSC_01053,SPSC_01291,SPSC_01618,SPSC_00734,SPSC_02117,SPSC_03216
GO:0012505	cellular catabolic process	Cellular component	2.06977	0.00237582	16	0.147587	SPSC_02859,SPSC_04367,SPSC_03368,SPSC_05439,SPSC_04115,SPSC_05145,SPSC_03088,SPSC_04398,SPSC_05619,SPSC_03434,SPSC_00297,SPSC_05288,SPSC_01053,SPSC_01291,SPSC_01618,SPSC_03216
GO:0005975	organelle subcompartment	Biological process	2.23308	0.00440186	9	0.157143	SPSC_01093,SPSC_06411,SPSC_04473,SPSC_05906,SPSC_04995,SPSC_01486,SPSC_05288,SPSC_01291,SPSC_02117

## Sheet: Table S4
Table S4 BLASTp results of genes in the MEpurple and MEdarkturquoise modules against the PHI database
PHI ID	Gene	Pathogen species	Mutant Phenotype	Identity	Gene Function	Technique	DOI
PHI:2234	SPSC_02155	Ustilago_maydis	loss_of_pathogenicity	0.635	Chorismate mutases	Gene deletion: full;Gene mutation: characterised	10.1038/nature10454
PHI:176	SPSC_04270;SPSC_04271;SPSC_04266;SPSC_04273;SPSC_04267;SPSC_04272;SPSC_04264	Ustilago_maydis	unaffected_pathogenicity	0.554;0.707;0.518;0.522;0.441;0.390;0.459	Unknown	Gene deletion	10.1128/mcb.20.1.329-339.2000
PHI:4987	SPSC_01958	Candida_albicans	reduced_virulence	0.459	beta-hexosaminidase	Gene disruption; gene complementation	10.1002/mbo3.274
PHI:10565	SPSC_04127	Streptococcus_suis	reduced_virulence	0.386	Alpha-1,2-mannosidase, putative	Gene deletion: full; gene complementation	10.3390/pathogens9050387
PHI:9867	SPSC_05439	Ustilago_maydis	reduced_virulence	0.952	Protein disulfide-isomerase	Gene deletion: full; gene complementation;Gene mutation	10.1371/journal.ppat.1007687
PHI:7911	SPSC_00958	Phytophthora_parasitica	reduced_virulence	0.492	Endo-beta-1,4-xylanase	Altered gene expression / gene regulation: silencing	10.1007/s00294-018-0814-z
PHI:7181	SPSC_04071	Beauveria_bassiana	reduced_virulence	0.709	Peptidyl-prolyl cis-trans isomerase - putative secretory protein	Gene deletion: full; gene complementation	10.1016/j.fgb.2017.05.004
PHI:504	SPSC_03548	Saccharomyces_cerevisiae	reduced_virulence	0.737	beta-isopropyl-malate dehydrogenase	Gene deletion	no data found
PHI:7511	SPSC_01618	Klebsiella_pneumoniae	unaffected_pathogenicity	0.505	Serine 3-dehydrogenase	Gene deletion: full	10.1128/mSphere.00341-17
PHI:3223	SPSC_03260	Ustilago_maydis	reduced_virulence	0.766	inhibitor of programmed cell death in host during infection	Gene mutation	10.1094/MPMI-10-13-0317-R
PHI:3226	SPSC_00819	Penicillium_digitatum	reduced_virulence	0.552	pectin lyase	Gene deletion: full	10.1111/mpp.12179
PHI:5406	SPSC_01053	Xanthomonas_campestris	reduced_virulence	0.454	4-HBA degradation pathway components	Gene mutation; gene complementation	10.1038/srep18456
PHI:10468	SPSC_00434	Trichophyton_rubrum	reduced_virulence	0.566	BZIP domain-containing protein	Gene deletion: full	10.3389/fmicb.2020.00193
PHI:1087	SPSC_04535;SPSC_01152	Fusarium_graminearum	unaffected_pathogenicity	0.439;0.467	Unknown	Gene disruption	10.1016/j.fgb.2008.09.004
PHI:7257	SPSC_03150	Radopholus_similis	reduced_virulence	0.419	Serine carboxypeptidases, esophageal gland-secreted protein	Altered gene expression / gene regulation: silencing	10.1038/s41598-017-05093-7
PHI:5395	SPSC_01486	Magnaporthe_oryzae	reduced_virulence	0.604	Endoplasmic reticulum (ER) membrane transporter for precursors of secretory proteins.	Gene disruption	10.1111/mpp.12357
PHI:3936	SPSC_03301	Sclerotinia_sclerotiorum	loss_of_pathogenicity	0.58	encodes a secretory protein with a putative Ca2 binding EF-hand motif	Gene disruption; gene complementation	10.1094/MPMI-05-13-0145-R
PHI:1414	SPSC_02566	Fusarium_graminearum	unaffected_pathogenicity	0.649	transcription factor	Gene deletion	10.1371/journal.ppat.1002310
PHI:9126	SPSC_02966	Brucella_abortus	reduced_virulence	0.486	choline dehydrogenase	Gene disruption; gene complementation	10.1128/JB.00105-18
PHI:812	SPSC_06072	Magnaporthe_oryzae	reduced_virulence	0.397	Hypothetical protein	Gene disruption	10.1038/ng2002
PHI:9564	SPSC_03303	Aspergillus_fumigatus	reduced_virulence	0.775	3-Isopropylmalate dehydratase	Gene deletion: full; gene complementation	10.1080/21505594.2019.1682760
PHI:2920	SPSC_01092	Colletotrichum_graminicola	reduced_virulence	0.345	Functional ferroxidase	Gene deletion: full	10.1094/MPMI-01-13-0003-R
PHI:5190	SPSC_00607	Magnaporthe_oryzae	reduced_virulence	0.798	Peroxiredoxin peroxidase	Gene deletion: full	10.1038/srep11831
PHI:10485	SPSC_04473	Pseudomonas_aeruginosa	reduced_virulence	0.613	Heat shock protein	Gene mutation; gene complementation	10.3390/microorganisms8030395
PHI:184	SPSC_00877	Candida_albicans	reduced_virulence	0.459	Plant-pathogenesis related protein (PR-1)	Gene disruption	no data found
PHI:7281	SPSC_03216	Puccinia_striiformis	reduced_virulence	0.466	Invertase	Altered gene expression / gene regulation: silencing: gene complementation	10.1111/nph.14666
PHI:6628	SPSC_04390;SPSC_04753	Staphylococcus_aureus	reduced_virulence	0.421;0.446	BCAA transporter	Gene deletion: full; gene complementation	10.1111/mmi.13495
PHI:2854	SPSC_04475	Ustilago_maydis	unaffected_pathogenicity	0.579	cis-Active Elements	Gene mutation: characterised	10.1094/MPMI-18-0075
PHI:7376	SPSC_06259	Beauveria_bassiana	reduced_virulence	0.412	LysM effector protein	Gene deletion: full; heterologous complementation	10.1371/journal.ppat.1006604
PHI:5394	SPSC_04115	Beauveria_bassiana	loss_of_pathogenicity	0.522	Heat shock protein classified to Hsp40 group	Gene mutation; gene complementation	10.1111/1462-2920.13197
PHI:8716	SPSC_06411	Candida_albicans	loss_of_pathogenicity	0.546	beta-1,6-glucan synthase	Gene deletion: full; gene complementation	10.1111/mmi.14176
PHI:6927	SPSC_05288	Magnaporthe_oryzae	reduced_virulence	0.5	Ubiquitin ligase	Gene deletion: full; gene complementation	10.1111/1462-2920.13515
PHI:8769	SPSC_05697	Metarhizium_acridum	unaffected_pathogenicity	0.469	Ser/Thr protein phosphatase	Gene deletion: full; gene complementation	10.1007/s00253-018-9567-3
PHI:1674	SPSC_06113	Fusarium_graminearum	unaffected_pathogenicity	0.532	transcription factor	Gene deletion	10.1371/journal.ppat.1002310
PHI:4229	SPSC_00720	Aspergillus_fumigatus	unaffected_pathogenicity	0.471	ABC transporter-encoding genes	Gene deletion: full	10.1128/EC.00171-13
PHI:278	SPSC_00441	Botrytis_cinerea	reduced_virulence	0.452	Pectin Methylesterase	Gene deletion;Gene disruption; gene complementation	10.1111/J.1364-3703.2005.00312.X;10.1094/MPMI.2003.16.4.360
PHI:8803	SPSC_05931	Fusarium_graminearum	unaffected_pathogenicity	0.548	Putative salicylate hydroxylase	Gene deletion: full; gene complementation	10.3389/fmicb.2018.03219
PHI:397	SPSC_01590	Cryptococcus_neoformans	unaffected_pathogenicity	0.56	Laccase	Gene disruption; gene complementation	10.1128/EC.4.1.190-201.2005
PHI:9986	SPSC_04003	Xanthomonas_oryzae	reduced_virulence	0.681	Cystathionine gamma-synthase (CGS) (O-succinylhomoserine(Thiol)-lyase)	Gene deletion: full; gene complementation	10.3390/microorganisms7120693
PHI:1555	SPSC_00398;SPSC_01989	Fusarium_graminearum	unaffected_pathogenicity	0.449;0.420	transcription factor	Gene deletion	10.1371/journal.ppat.1002310
PHI:7788	SPSC_05314	Pseudomonas_syringae	reduced_virulence	0.493	Indole-3-acetaldehyde dehydrogenase	Gene disruption	10.1371/journal.ppat.1006811
PHI:2517	SPSC_05672	Aspergillus_fumigatus	lethal	0.757	Tryptophan synthase	Altered gene expression / gene regulation	10.1371/journal.ppat.0030024
PHI:2411	SPSC_06226	Sclerotinia_sclerotiorum	reduced_virulence	0.596	Gamma-Glutamyl Transpeptidase	Gene deletion: full	10.1094/MPMI-06-11-0159
PHI:10949	SPSC_00476	Aspergillus_carbonarius	reduced_virulence	0.499	GMC oxidoreductase	Gene deletion: full; gene complementation	10.1111/mpp.13013
PHI:2968	SPSC_06136	Cryptococcus_neoformans	reduced_virulence	0.501	Glucose uptake and transport	Gene mutation: characterised; gene complementation	10.1371/journal.pone.0064239
PHI:9816	SPSC_06044	Ralstonia_solanacearum	reduced_virulence	0.459	Trehalose synthase	Gene deletion: full	10.1094/MPMI-08-19-0218-R
PHI:1655	SPSC_02859	Fusarium_graminearum	unaffected_pathogenicity	0.528	transcription factor	Gene deletion	10.1371/journal.ppat.1002310
PHI:158	SPSC_04954	Ustilago_maydis	reduced_virulence	0.946	Protein kinase	Gene deletion	no data found
PHI:785	SPSC_00283	Magnaporthe_oryzae	reduced_virulence	0.49	Hypothetical protein	Gene disruption	10.1038/ng2002
PHI:4024	SPSC_01034;SPSC_03154	Magnaporthe_oryzae	unaffected_pathogenicity	0.512;0.445	hexose transporter-like protein	Gene disruption; gene complementation	10.1111/1574-6968.12369
PHI:7173	SPSC_02096	Verticillium_dahliae	reduced_virulence	0.444	Isotrichodermin C-15 hydroxylase	Gene mutation	10.1038/nplants.2016.153
PHI:4906	SPSC_02261	Candida_albicans	reduced_virulence	0.635	A Golgi-associated protein	Gene mutation; gene complementation	10.1128/EC.00231-14
PHI:824	SPSC_00426	Burkholderia_glumae	loss_of_pathogenicity	0.483	DNA gyrase (bacterial topoisomerase II)	Sequence analysis of sensitive and resistant strains;Gene mutation: characterised	10.1128/AEM.70.9.5613-5620.2004
PHI:6227	SPSC_00297	Colletotrichum_graminicola	reduced_virulence	0.509	beta-1,6-glucan synthesis	Altered gene expression / gene regulation: silencing	10.1111/tpj.13205
PHI:9204	SPSC_01291	Ustilago_maydis	loss_of_pathogenicity	0.9	Signal peptide peptidase	Gene mutation; gene complementation	10.1371/journal.ppat.1007734
PHI:465	SPSC_04199	Ustilago_maydis	reduced_virulence	0.721	Kinesin	Gene disruption	10.1093/emboj/16.12.3464
PHI:2488	SPSC_05072	Magnaporthe_oryzae	unaffected_pathogenicity	0.472	a-1,2-mannosidase	Gene deletion: full	10.1007/s00294-009-0261-y
PHI:1511	SPSC_04985	Fusarium_graminearum	reduced_virulence	0.458	transcription factor	Gene deletion	10.1371/journal.ppat.1002310
PHI:9041	SPSC_03144	Fusarium_graminearum	reduced_virulence	0.473	Hypothetical protein	Gene deletion: full	10.1038/s41467-019-08726-9
PHI:1273	SPSC_03434	Fusarium_graminearum	unaffected_pathogenicity	0.508	protein kinase	Gene deletion: full	10.1371/journal.ppat.1002460
PHI:394	SPSC_01526	Ustilago_maydis	loss_of_pathogenicity	0.841	CDK-related kinase	Gene deletion	10.1101/gad.314904
PHI:10606	SPSC_04447	Pseudomonas_aeruginosa	unaffected_pathogenicity	0.436	Long-chain-fatty-acid?CoAligase	Gene mutation	10.1093/nar/gkaa377
PHI:2976	SPSC_05662;SPSC_01798	Colletotrichum_gloeosporioides	reduced_virulence	0.496;0.541	Oligopeptide transporters of the OPT family	Altered gene expression / gene regulation: silencing	10.1186/1471-2180-9-173
PHI:66	SPSC_05063	Candida_albicans	reduced_virulence	0.622	Tyrosine phosphatase	Gene disruption; gene complementation	10.1091/mbc.8.12.2539
PHI:464	SPSC_05614;SPSC_03976	Ustilago_maydis	unaffected_pathogenicity	0.566;0.780	Kinesin	Gene disruption	10.1093/emboj/16.12.3464
PHI:1109	SPSC_04636	Ustilago_maydis	reduced_virulence	0.901	Chitin Synthase	Gene deletion	10.1105/tpc.105.037341
PHI:2240	SPSC_01757	Ustilago_maydis	reduced_virulence	0.934	Sucrose Transporter	Gene deletion: full; gene complementation	10.1371/journal.pbio.1000303
PHI:7324	SPSC_04589	Puccinia_striiformis	reduced_virulence	0.519	Calmodulin-dependent protein kinase	Altered gene expression / gene regulation: silencing	10.1111/1462-2920.13881
PHI:3190	SPSC_00088	Ustilago_maydis	reduced_virulence	0.462	Part of the largest Effector Gene Cluster	Gene mutation	10.1371/journal.ppat.1003866
PHI:958	SPSC_00097	Ustilago_maydis	reduced_virulence	0.548	hypothetical protein	Gene deletion	10.1038/nature05248
PHI:68	SPSC_05794	Candida_albicans	reduced_virulence	0.393	Aspartyl proteinase	Gene disruption	no data found
PHI:6124	SPSC_01537	Fusarium_graminearum	reduced_virulence	0.613	NA	Gene mutation; gene complementation	10.1371/journal.ppat.1005485
PHI:754	SPSC_03542;SPSC_03543	Ustilago_maydis	increased_virulence_(hypervirulence)	0.522;0.535	conserved hypothetical Ustilago-specific protein	Gene deletion	10.1038/nature05248
PHI:6346	SPSC_03285	Ustilago_maydis	reduced_virulence	0.459	Effector	Gene deletion: full; gene complementation	10.1111/mpp.12442
PHI:755	SPSC_03541	Ustilago_maydis	increased_virulence_(hypervirulence)	0.416	conserved hypothetical Ustilago-specific protein	Gene deletion	10.1038/nature05248
PHI:942	SPSC_00084	Ustilago_maydis	reduced_virulence	0.565	hypothetical protein	Gene deletion	10.1038/nature05248
PHI:954	SPSC_00095	Ustilago_maydis	reduced_virulence	0.49	conserved hypothetical Ustilago-specific protein	Gene deletion	10.1038/nature05248
PHI:9456	SPSC_04308	Orbilia_oligospora	unaffected_pathogenicity	0.451	Velvet family protein	Gene deletion: full	10.3389/fmicb.2019.01917
PHI:124	SPSC_00940	Candida_albicans	reduced_virulence	0.39	Integrin	Gene disruption; gene complementation	10.1126/science.279.5355.1355
PHI:1230	SPSC_02721	Fusarium_graminearum	lethal	0.729	protein kinase	Gene deletion: full	10.1371/journal.ppat.1002460
PHI:9509	SPSC_04878	Coxiella_burnetii	unaffected_pathogenicity	0.475	Glucose/galactose transporter	Gene mutation; gene complementation	10.1042/BCJ20190504
PHI:1063	SPSC_04455	Magnaporthe_oryzae	reduced_virulence	0.615	nonhistone protein containing an HMG1 box	Gene deletion; gene complementation	10.1016/j.fgb.2007.06.003
PHI:269	SPSC_03828	Ustilago_maydis	loss_of_pathogenicity	0.784	GTP-binding protein	Gene disruption; gene complementation	10.1128/EC.1.6.954-966.2002

## Sheet: Table S5
Table S5 Prediction of candidate effectors in S. scitamineum
Gene ID	Uniprot annotation	Protein Length (AA)	Cysteine percentage (%)	Signal peptide likelihood	Signal peptide position	Location	Transmembrane domain numbers
SPSC_01337	Uncharacterized protein	61	27.8689	5e-06	NA	Extracellular(Secreted)	0
SPSC_01622	Related to DNA2-DNA helicase	300	5	7e-06	NA	Extracellular(Secreted)	0
SPSC_06457	Uncharacterized protein	169	2.95858	0.999738	pos: 23-24	Extracellular(Secreted)	0
SPSC_04273	Related to Mig1 protein	241	2.90456	0.999132	pos: 27-28	Extracellular(Secreted)	0
SPSC_04265	Related to Mig1 protein	176	2.84091	0.999799	pos: 28-29	Extracellular(Secreted)	0
SPSC_01739	Uncharacterized protein	141	2.83688	0.999744	pos: 23-240	Extracellular(Secreted)	0
SPSC_03391	Uncharacterized protein	110	2.72727	0		Cytoplasmic	0
SPSC_04761	Alpha-galactosidase	301	2.65781	0.967606	pos: 27-282	Extracellular(Secreted)	0
SPSC_04271	Probable Mig1 protein, induced during biotrophic phase	193	2.59067	0.999721	pos: 20-212	Extracellular(Secreted)	0
SPSC_03603	Uncharacterized protein	161	2.48447	0.999737	pos: 21-222	Extracellular(Secreted)	0
SPSC_04270	Related to Mig1-Mig1 protein, induced during biotrophic phase	203	2.46305	0.998484	pos: 25-265	Extracellular(Secreted)	0
SPSC_04342	Uncharacterized protein	204	2.45098	0.968173	pos: 25-264	Extracellular(Secreted)	0
SPSC_04272	Uncharacterized protein	214	2.33645	0.999711	pos: 28-292	Extracellular(Secreted)	0
SPSC_04111	Uncharacterized protein	262	2.29008	0.999765	pos: 22-237	Extracellular(Secreted)	0
SPSC_02789	Uncharacterized protein	396	2.27273	0.999532	pos: 26-272	Extracellular(Secreted)	0
SPSC_03260	Pep1	177	2.25989	0.999765	pos: 26-273	Extracellular(Secreted)	0
SPSC_04535	Uncharacterized protein	371	2.15633	0.999762	pos: 21-224	Extracellular(Secreted)	0
SPSC_03076	Uncharacterized protein	239	2.09205	0.999709	pos: 21-229	Extracellular(Secreted)	0
SPSC_00441	Uncharacterized protein	391	2.04604	0.999752	pos: 22-237	Golgi	0
SPSC_00734	Uncharacterized protein	312	1.92308	5e-06	NA	Cytoplasmic	0
SPSC_03828	Probable small G-protein Ras2	211	1.89573	0	NA	Plasmamembrane	0
SPSC_01638	Flap endonuclease 1	375	1.86667	0	NA	Plasmamembrane	0
SPSC_02198	Uncharacterized protein	221	1.80995	1.1e-05	NA	Golgi	0
SPSC_01364	Uncharacterized protein	118	1.69492	1e-06	NA	Mitochondrial	0
SPSC_06629	Uncharacterized protein	179	1.67598	0.999761	pos: 25-261	Mitochondrial	0
SPSC_06635	Related to MSH6-DNA mismatch repair protein	120	1.66667	0.999736	pos: 23-244	Mitochondrial	0
SPSC_00097	Uncharacterized protein	184	1.63043	0.999533	pos: 24-255	Extracellular(Secreted)	0
SPSC_02316	Uncharacterized protein	309	1.61812	7e-06	NA	Mitochondrial	0
SPSC_00606	Uncharacterized protein	125	1.6	0	NA	Nuclear	0
SPSC_01689	Thiamine thiazole synthase	346	1.44509	0	NA	Mitochondrial	0
SPSC_05697	Uncharacterized protein	214	1.40187	0	NA	Golgi	0
SPSC_02941	Uncharacterized protein	216	1.38889	0.999741	pos: 18-197	Extracellular(Secreted)	0
SPSC_06156	Uncharacterized protein	219	1.36986	0.999742	pos: 24-258	Extracellular(Secreted)	0
SPSC_01148	Uncharacterized protein	373	1.34048	0.99973	pos: 26-277	Nuclear	0
SPSC_02450	Uncharacterized protein	75	1.33333	0	NA	Extracellular(Secreted)	0
SPSC_04157	Uncharacterized protein	151	1.3245	0.999672	pos: 20-216	Mitochondrial	0
SPSC_01053	Related to hydroxyquinol-1, 2-dioxygenase	315	1.26984	0	NA	Mitochondrial	0
SPSC_03144	Related to Oxidoreductase, short-chain dehydrogenase	341	1.17302	0	NA	Mitochondrial	0
SPSC_03548	Probable LEU2-beta-isopropyl-malate dehydrogenase	380	1.05263	0	NA	Cytoplasmic	0
SPSC_05288	Probable UBC6-E2 ubiquitin-conjugating enzyme	296	1.01351	0	NA	Endoplasmicreticulum	1
SPSC_00843	Probable Alpha-L-arabinofuranosidase	329	0.911854	0.999753	pos: 20-213	Extracellular(Secreted)	0
SPSC_10005	Uncharcterized protein	110	0.909091	0.99977	pos: 22-233	Extracellular(Secreted)	0
SPSC_05978	Uncharacterized protein	225	0.888889	0.999743	pos: 23-240	Extracellular(Secreted)	0
SPSC_03041	Uncharacterized protein	342	0.877193	0	NA	Mitochondrial	4
SPSC_05625	Uncharacterized protein	342	0.877193	6e-06	NA	Nuclear	0
SPSC_05233	Uncharacterized protein	238	0.840336	0	NA	Nuclear	0
SPSC_03677	Uncharacterized protein	122	0.819672	0.999739	pos: 24-252	Extracellular(Secreted)	0
SPSC_00559	Related to Transaldolase B	379	0.791557	0	NA	Mitochondrial	0
SPSC_04367	Uncharacterized protein	391	0.767263	0.006725	NA	Mitochondrial	0
SPSC_02989	Uncharacterized protein	294	0.680272	0.996715	pos: 23-249	Mitochondrial	0
SPSC_01710	Uncharacterized protein	302	0.662252	0.999772	pos: 21-220	Extracellular(Secreted)	0
SPSC_02155	Related to secreted chorismate mutase	303	0.660066	0.999718	pos: 28-297	Endoplasmicreticulum	0
SPSC_01618	Related to AYR1-NADPH-dependent 1-acyl dihydroxyacetone phosphate reductase	309	0.647249	0	NA	Mitochondrial	0
SPSC_05348	Uncharacterized protein	318	0.628931	0	NA	Cytoplasmic	0
SPSC_05323	Uncharacterized protein	161	0.621118	0.999684	pos: 24-253	Extracellular(Secreted)	0
SPSC_03541	Uncharacterized protein	341	0.58651	0.390216	NA	Mitochondrial	0
SPSC_02041	Uncharacterized protein	172	0.581395	3.3e-05	NA	Mitochondrial	0
SPSC_05116	Uncharacterized protein	360	0.555556	1.00003	pos: 24-252	Mitochondrial	0
SPSC_06090	Uncharacterized protein	361	0.554017	0.999687	pos: 21-222	Extracellular(Secreted)	0
SPSC_03006	Uncharacterized protein	385	0.519481	0.999521	pos: 21-226	Extracellular(Secreted)	0
SPSC_05270	Uncharacterized protein	201	0.497512	0.999779	pos: 19-209	Extracellular(Secreted)	0
SPSC_04517	Uncharacterized protein	206	0.485437	0.999654	pos: 18-198	Extracellular(Secreted)	0
SPSC_00084	Uncharacterized protein	208	0.480769	0.940096	pos: 26-278	Extracellular(Secreted)	0
SPSC_04071	Peptidyl-prolyl cis-trans isomerase	211	0.473934	0.99946	pos: 30-318	Extracellular(Secreted)	0
SPSC_00607	Probable thioredoxin peroxidase	222	0.45045	2.8e-05	NA	Mitochondrial	0
SPSC_00095	Uncharacterized protein	230	0.434783	0.999763	pos: 24-254	Extracellular(Secreted)	0
SPSC_04455	Uncharacterized protein	253	0.395257	1e-06	NA	Nuclear	0
SPSC_02107	Uncharacterized protein	258	0.387597	0.981589	pos: 25-269	Mitochondrial	0
SPSC_04516	Uncharacterized protein	294	0.340136	0.999761	pos: 25-268	Extracellular(Secreted)	0
SPSC_02940	Uncharacterized protein	294	0.340136	0.999752	pos: 24-251	Extracellular(Secreted)	0
SPSC_02566	Related to ERJ5-Type I membrane protein preserves the folding capacity of the endoplasmic reticulum	345	0.289855	0.999717	pos: 24-251	Mitochondrial	1
SPSC_03543	Uncharacterized protein	378	0.26455	0.000232	NA	Mitochondrial	0
SPSC_05858	Related to Phosducin	380	0.263158	0	NA	Nuclear	0
SPSC_04519	Uncharacterized protein	151	0	0.999666	pos: 20-213	Extracellular(Secreted)	0
SPSC_06003	Transcription and mRNA export factor SUS1	190	0	0.999693	pos: 23-247	Nuclear	0
SPSC_10007	Uncharacterized protein	124	0	0.999582	pos: 22-236	Peroxisomal	0
SPSC_06088	Uncharacterized protein	318	0	0.999651	pos: 24-252	Mitochondrial	0
SPSC_06085	Uncharacterized protein	184	0	0.999674	pos: 30-310	Mitochondrial	0
SPSC_05105	Uncharacterized protein	338	0	0.607632	pos: 23-249	Mitochondrial	0
SPSC_06073	Uncharacterized protein	258	0	0	NA	Mitochondrial	0
SPSC_02106	Uncharacterized protein	344	0	0.999753	pos: 22-238	Extracellular(Secreted)	0
SPSC_05321	Uncharacterized protein	317	0	0.999743	pos: 22-233	Extracellular(Secreted)	0
SPSC_06087	Uncharacterized protein	166	0	0.999746	pos: 18-198	Mitochondrial	0
SPSC_05603	Uncharacterized protein	354	0	0.001779	NA	Nuclear	0
SPSC_01554	Uncharacterized protein	240	0	0.999503	pos: 22-239	Extracellular(Secreted)	0
SPSC_06151	Uncharacterized protein	280	0	0.99973	pos: 19-203	Extracellular(Secreted)	0
SPSC_06094	Uncharacterized protein	151	0	0.999799	pos: 21-221	Extracellular(Secreted)	0
SPSC_06630	Uncharacterized protein	123	0	0.999764	pos: 29-305	Extracellular(Secreted)	0
SPSC_00088	Uncharacterized protein	279	0	0.999619	pos: 27-282	Extracellular(Secreted)	0
SPSC_00750	Uncharacterized protein	169	0	0.985393	pos: 37-386	Extracellular(Secreted)	0
SPSC_10006	Uncharacterized protein	130	0	0.999743	pos: 22-233	Extracellular(Secreted)	0
SPSC_03542	Uncharacterized protein	370	0	0.99977	pos: 20-219	Golgi	0
SPSC_06205	Uncharacterized protein	314	0	0.999746	pos: 24-259	Extracellular(Secreted)	0
SPSC_04518	Uncharacterized protein	284	0	0.99975	pos: 20-215	Extracellular(Secreted)	0
SPSC_05108	Uncharacterized protein	225	0	0.999758	pos: 20-218	Extracellular(Secreted)	0
SPSC_01502	Uncharacterized protein	208	0	0.999777	pos: 21-229	Mitochondrial	0
SPSC_01501	Related to Effector family protein Eff1	221	0	0.999707	pos: 29-303	Mitochondrial	0
SPSC_00571	Uncharacterized protein	113	0	0	NA	Golgi	0
SPSC_05327	Uncharcterized protein	167	0	0.999746	pos: 20-213	Extracellular(Secreted)	0
SPSC_05511	Uncharcterized protein	130	0	3e-06	NA	Nuclear	0
Note: These proteins were not considered as candidate effectors according to rules of Small Secreted Cysteine-rich Proteins (SCRPs). Other prediction results were listed in Table 3.
